# Supplementary material for: Integrated QTL and eQTL Mapping Provides Insights and Candidate Genes for Fatty Acid Composition, Flowering Time, and Growth Traits in a F2 Population of a Novel Synthetic Allopolyploid Brassica napus
Source: Front Plant Sci. 2018 Nov 13;9:1632. doi: 10.3389/fpls.2018.01632 (PMC6243938; doi:10.3389/fpls.2018.01632)
Supplement: Supplementary file 2 [file Table_2.XLSX]

## Sheet: sheet1
parent data
SampleID	genotype	tissue	TotalReads	Q20_MoreBasesRate	Percent_Unique_Mapped	Percent_Multi_Mapped	Percent_Unmapped_Too_Short	Percent_Unmapped_Other
05-11-Final-8ul	Da-Ae	early-silique	79324450	93.74	55.05	15.34	16.1	0.02
1	Da-Ol-1	Young	75268572	94.45	34.34	39.71	13.41	0.01
2	Da-Ol-1	flowering	75255486	94.39	50.73	18.61	21.54	0.11
3	Da-Ol-1	early-silique	84551132	94.89	51.38	19.39	19.26	0.01
4	Da-Ol-1	late-silique	66754500	94.26	51.1	20.45	18.88	0.02
5	Da-Ae	Young	60101200	93.86	43.48	30.99	13.63	0.02
6	Da-Ae	flowering	76490458	93.34	48.67	18.31	27.73	0.03
8	Da-Ae	late-silique	60407886	94.51	52.03	20.66	15.13	0.03
Ae_Cho_2	Da-Ae	early-silique	49344902	96.89	51.61	14.49	29.02	0.03
Ae_Cho_3	Da-Ae	early-silique	56978138	97.1	51.63	15.8	25.93	0.02
Ae_Chu_2	Da-Ae	bolting	60508378	96.48	54.26	12.42	29.87	0.07
Ae_Gae_2	Da-Ae	flowering	50165440	97.15	53	13.44	29.25	0.06
Ae_Gae_3	Da-Ae	flowering	45141856	97.17	49.41	15.77	29.43	0.09
Ae_Hu_2	Da-Ae	late-silique	45292356	97.15	49.17	16.34	27.93	0.02
Ae_Hu_3	Da-Ae	late-silique	47190474	97.68	55.59	16.31	20.33	0.04
Ae_Yeong_2	Da-Ae	Young	53430974	97.37	53.37	14.72	27.75	0.02
Ae_Yeong_3	Da-Ae	Young	55717802	97.24	50.66	17.56	26.21	0.03
All1_Cho_2	Da-Ol-1	early-silique	45190744	97.6	53.55	16.57	23.38	0.02
All1_Cho_3	Da-Ol-1	early-silique	53792382	96.79	54.74	15.28	24.33	0.05
All1_Chu_2	Da-Ol-1	bolting	57947136	97.29	50.96	15.97	28.35	0.03
All1_Chu_3	Da-Ol-1	bolting	52049998	97.18	55.15	15.47	23.99	0.02
All1_Gae_2	Da-Ol-1	flowering	46516634	97.22	52.39	14.13	28.67	0.07
All1_Gae_3	Da-Ol-1	flowering	56162722	97.12	52.08	14.18	28.79	0.06
All1_Hu_2	Da-Ol-1	late-silique	46153810	97.41	55.59	15.72	20.12	0.09
All1_Hu_3	Da-Ol-1	late-silique	55296744	96.83	52.87	14.74	26.05	0.11
All1_Yeong2_160621	Da-Ol-1	Young	56960528	95.02	39.76	28.05	18.2	0.01
All1_Yeong3_160621	Da-Ol-1	Young	66206092	93.98	47.15	20.19	24.59	0.01

## Sheet: sheet2
F2 data
Sample	TotalReads	Percent_Unique_Mapped	Percent_Multi_Mapped	Percent_Unmapped_Too_Short	Percent_Unmapped_Other
Sample_F2_100	24026533	58.29	14.27	16.24	0.01
Sample_F2_101	23569835	55.17	15.67	13.52	0.03
Sample_F2_102	22279153	56.26	15.47	18.45	0.02
Sample_F2_103	22199915	39.86	26.26	16.5	0.04
Sample_F2_104	23427919	33.73	28.93	20.24	0.01
Sample_F2_105	23845244	31.45	34.45	9.43	0.01
Sample_F2_106	23622651	30.48	36.53	10.98	0.01
Sample_F2_109	23435948	35.57	27.61	19.16	0.01
Sample_F2_10	23676836	56.62	16.45	15.24	0.01
Sample_F2_111	25611316	37.72	27.92	14.11	0.01
Sample_F2_112	23522641	35.5	30.01	16.07	0.01
Sample_F2_113	24995289	30.66	32.77	16.06	0
Sample_F2_114	24830355	29.3	36.76	12.95	0.01
Sample_F2_116	22905045	39.7	28.84	12.93	0.01
Sample_F2_117	26857097	32.8	35.02	12.29	0.01
Sample_F2_118	23685549	34.63	30.79	13.29	0.01
Sample_F2_119	22649364	32.2	32.68	16.23	0.01
Sample_F2_120	26402359	27.29	40.49	12.91	0
Sample_F2_121	26597627	34.58	29.36	15.71	0.01
Sample_F2_122	25230148	42.48	26.55	11.9	0.01
Sample_F2_123	22599798	30.51	38.55	12.66	0.01
Sample_F2_124	27866232	27.7	35.6	16.64	0
Sample_F2_126	25201942	27.2	37	12.03	0
Sample_F2_127	21626487	32.21	35.21	12.47	0.01
Sample_F2_128	25628320	35.44	28.43	16.87	0.01
Sample_F2_129	26000288	36.4	27.56	16.79	0.01
Sample_F2_12	23048918	60.3	11.78	22.05	0.03
Sample_F2_130	27023772	32.05	31.36	15.35	0.03
Sample_F2_132	21773561	34.8	29.83	15.43	0.01
Sample_F2_133	24935450	36.37	27.17	15.63	0.01
Sample_F2_134	26005292	35.86	30.34	12.32	0.03
Sample_F2_135	28288182	39.21	28.51	13.09	0.01
Sample_F2_136	20844851	30.18	36.11	11.92	0.01
Sample_F2_137	24791307	40.72	25.2	13.93	0.02
Sample_F2_138	22157220	35.66	28.58	15.06	0.01
Sample_F2_139	19583930	41.09	28.27	14.14	0.01
Sample_F2_13	21111548	62.76	11.39	18.82	0.02
Sample_F2_143	18326994	30.06	35.58	13.68	0.01
Sample_F2_147	13280336	36.48	28.48	12.55	0.13
Sample_F2_156	23927998	33.94	30.3	15	0.01
Sample_F2_157	23470826	32.69	30	18.71	0.01
Sample_F2_15	23915956	64.57	12.13	17.51	0.01
Sample_F2_16	22741523	63.87	11.65	17.5	0.02
Sample_F2_171	25280153	33.05	31.71	17.49	0.01
Sample_F2_175	28502185	40.4	24.17	19.15	0.01
Sample_F2_176	26081326	30.77	34.16	17.19	0.01
Sample_F2_177	25244741	26.01	39.08	17.1	0.01
Sample_F2_17	22476363	63.03	12.57	15.95	0.02
Sample_F2_180	26106507	28.39	36.05	15.24	0.01
Sample_F2_18	23727269	58.06	14.09	17.6	0.02
Sample_F2_19	23712135	60.37	12.23	15.61	0.07
Sample_F2_1	23949962	57.16	12.45	19.35	0.11
Sample_F2_20	24334008	60.68	13.99	13.61	0.06
Sample_F2_21	23630545	54.11	14.7	14.89	0.02
Sample_F2_23	24758754	52.95	17.93	16.26	0.01
Sample_F2_24	24211060	60.54	13.15	14.79	0.03
Sample_F2_25	23101662	57.67	13	15.19	0.11
Sample_F2_26	25265814	61.43	14.5	14.18	0.02
Sample_F2_27	24576943	57.86	15.3	15.05	0.02
Sample_F2_28	24685143	58.79	13.78	15.6	0.02
Sample_F2_29	23645513	56.36	14.3	17.45	0.05
Sample_F2_2	23962586	59.82	14.23	16.91	0.02
Sample_F2_30	25004703	59.12	11.56	19.33	0.1
Sample_F2_34	23015563	55.89	16.03	11.77	0.02
Sample_F2_35	22880349	63.3	10.97	18.57	0.06
Sample_F2_36	25286885	61.38	12.93	17.47	0.03
Sample_F2_37	23227786	59.09	12.59	20.18	0.03
Sample_F2_38	23818029	60.58	12.06	17.35	0.03
Sample_F2_39	23741427	59.66	15.16	12.38	0.04
Sample_F2_3	23482489	55.32	15.52	17.45	0.01
Sample_F2_41	23419602	62.28	10.6	21.45	0.03
Sample_F2_42	23039116	58.82	14.18	15.65	0.03
Sample_F2_45	23115368	64.97	12	18.17	0.03
Sample_F2_47	24456680	56.71	16.03	13.38	0.02
Sample_F2_48	24475763	62.89	12.73	16.21	0.02
Sample_F2_49	24469844	56.85	15.05	19.91	0.02
Sample_F2_4	23388355	59.02	12.69	18.86	0.03
Sample_F2_51	25516127	58.34	12.58	16.62	0.27
Sample_F2_52	22980473	60.71	12.34	15.53	0.18
Sample_F2_53	23652582	59.87	14.07	19.15	0.02
Sample_F2_55	24784712	59.5	14.69	12.91	0.11
Sample_F2_57	23886387	57.14	14.9	15.95	0.02
Sample_F2_58	23041994	62.41	13.57	16.47	0.02
Sample_F2_60	24955725	60.65	14.64	12.29	0.17
Sample_F2_61	23675975	59.48	14.97	15.53	0.01
Sample_F2_62	24101005	61.91	12.78	20.94	0.03
Sample_F2_63	22702991	60.86	13.8	13	0.08
Sample_F2_64	24551845	58.97	14.54	15.15	0.02
Sample_F2_65	28392446	66.92	12.41	16.78	0.02
Sample_F2_67	23195698	58.11	13.76	20.01	0.01
Sample_F2_68	23931735	57.35	17.15	17.31	0.01
Sample_F2_69	23916521	59.57	13.27	21.69	0.02
Sample_F2_6	33806011	56.61	14.47	19.16	0.01
Sample_F2_72	23618111	58.98	14.49	15.29	0.03
Sample_F2_73	24707498	53.74	18.06	18.04	0.01
Sample_F2_74	25479586	62.51	12.65	20.34	0.01
Sample_F2_75	23241561	59.88	13.37	21.16	0.02
Sample_F2_76	24419016	59.28	15.8	15.95	0.03
Sample_F2_77	24389367	59.3	13.65	17.71	0.03
Sample_F2_78	25489272	60.17	15.01	17.78	0.02
Sample_F2_79	23938989	60.26	14.02	18.79	0.02
Sample_F2_7	23782737	59.78	13.95	15.68	0.02
Sample_F2_80	24411354	59.37	14.94	16.49	0.02
Sample_F2_81	24639689	62.7	12.49	18.35	0.03
Sample_F2_82	22476650	59.45	14.61	19.21	0.01
Sample_F2_84	23766348	58.37	15.62	16.16	0.03
Sample_F2_85	24192569	56.31	16.57	15.84	0.01
Sample_F2_86	24997159	58.65	15.05	18.79	0.01
Sample_F2_87	24247614	57.65	15.33	16.97	0.02
Sample_F2_88	25271391	57.56	15.1	15.03	0.04
Sample_F2_89	22462637	60.27	14.83	17.03	0.01
Sample_F2_8	23529141	62.54	11.47	18.67	0.06
Sample_F2_90	26319103	55.96	16.06	17.58	0.01
Sample_F2_91	18886907	32.32	30.86	17.43	0.01
Sample_F2_92	24147566	55.42	15.88	20.33	0.01
Sample_F2_94	27497413	57.96	14.21	17.94	0.02
Sample_F2_95	22366265	59.82	13.01	15.09	0.03
Sample_F2_96	23039131	60.98	13.55	19.72	0.02
Sample_F2_98	24875931	55.56	15.83	15.59	0.02
Sample_F2_99	24849990	62.47	14.07	14.35	0.01
Sample_F2_9	21247539	53.45	18.68	16.46	0.04
Sample_F2_125	24736655	51.81	23.69	11.04	0.02
Sample_F2_142	23557341	55.2	19.74	11.38	0.04
Sample_F2_144	28286513	40.39	23.1	16.87	0.3
Sample_F2_148	21698156	48.17	18.98	15.52	0.17
Sample_F2_152	22723993	51.07	21.33	13.71	0.02
Sample_F2_153	22734901	53.48	18.98	15.49	0.01
Sample_F2_154	23774886	55.75	19.94	10.98	0.02
Sample_F2_155	22840559	52.59	20.07	14.22	0.02
Sample_F2_158	24003897	53.43	18.26	16.16	0.01
Sample_F2_160	21949920	45.43	23.73	17.07	0.02
Sample_F2_161	21185340	52.37	19.55	14.61	0.02
Sample_F2_163	21792967	54.83	18.08	15.84	0.02
Sample_F2_165	23307593	57.16	17.82	11.39	0.02
Sample_F2_166	22736784	52.23	20.93	12.53	0.07
Sample_F2_169	23677880	50.13	22.84	12.98	0.05
Sample_F2_170	22023585	50.86	21.19	16.38	0.02
Sample_F2_172	24511776	47.35	21.43	15.09	0.01
Sample_F2_174	23227167	49.71	20.18	17.15	0.03
Sample_F2_181	24043919	52.46	21	13.66	0.02
Sample_F2_186	26897030	51.36	23.02	12.73	0.03
Sample_F2_14	29302183	48.62	22.11	15.56	0.04
Sample_F2_189	27733185	53.28	18.54	15.01	0.01
Sample_F2_191	24000255	40.43	26.35	15.98	0.02
Sample_F2_192	23833123	52.21	20.6	13.87	0.02
Sample_F2_207	18075648	48.72	21.08	17.55	0.04
Sample_F2_197	22582080	53.38	18.98	15.03	0.02
Sample_F2_198	22219562	51.22	21.66	14.13	0.02
Sample_F2_199	25283504	53	19.93	14.54	0.02
Sample_F2_201	25668483	49.91	21.77	15.55	0.05
Sample_F2_202	24074646	48.62	17.73	14.8	0.18
Sample_F2_32	24021555	53.48	21.04	11.5	0.16
Sample_F2_208	26715571	40.9	25.66	15.34	0.03
Sample_F2_212	24817186	52.12	20.47	13.14	0.09
Sample_F2_214	25737623	53.5	20.22	14.46	0.03
Sample_F2_217	25086494	53.87	18.76	16.61	0.03
Sample_F2_223	22372026	46.71	22.76	16.07	0.02
Sample_F2_224	23914869	50.91	21.47	14.72	0.02
Sample_F2_227	24193352	49	19.14	18.94	0.01
Sample_F2_231	26089926	55.28	18.39	13.96	0.04
Sample_F2_234	25361686	55.48	18.56	14.13	0.01
Sample_F2_40	26545315	51.64	22.14	12.18	0.04
Sample_F2_50	25462877	55.33	21.18	10.28	0.02
Sample_F2_56	22304917	53.27	18.42	15.79	0.02
Sample_F2_59	22324920	51.05	21.1	13.93	0.08
Sample_F2_107	23022512	53.24	19.53	16.21	0.02
