# Supplementary material for: Integrated QTL and eQTL Mapping Provides Insights and Candidate Genes for Fatty Acid Composition, Flowering Time, and Growth Traits in a F2 Population of a Novel Synthetic Allopolyploid Brassica napus
Source: Front Plant Sci. 2018 Nov 13;9:1632. doi: 10.3389/fpls.2018.01632 (PMC6243938; doi:10.3389/fpls.2018.01632)
Supplement: Supplementary file 5 [file Table_5.XLSX]

## Sheet: enriched_GO_term
	category	over_represented_pvalue	under_represented_pvalue	numDEInCat	numInCat	term	ontology	over_represented_padjust	Term	Definition
chrA01_128_129	NA	NA	NA	NA	NA	NA	NA	NA	NA	NA
chrA01_160_164	GO:0051252	3.06253e-05	1	2	10	regulation of RNA metabolic process	BP	0.0198146	regulation of RNA metabolic process	Any process that modulates the frequency, rate or extent of the chemical reactions and pathways involving RNA.
chrA02_0_9	NA	NA	NA	NA	NA	NA	NA	NA	NA	NA
chrA03_17_25	GO:0009972	4.30893e-07	1	3	8	cytidine deamination	BP	0.000278788	cytidine deamination	The removal of amino group in the presence of water.
chrA03_36_38	NA	NA	NA	NA	NA	NA	NA	NA	NA	NA
chrA03_43_43	NA	NA	NA	NA	NA	NA	NA	NA	NA	NA
chrA03_49_64.734	GO:0006633	9.46933e-16	1	23	248	fatty acid biosynthetic process	BP	6.12665e-13	fatty acid biosynthetic process	The chemical reactions and pathways resulting in the formation of a fatty acid, any of the aliphatic monocarboxylic acids that can be liberated by hydrolysis from naturally occurring fats and oils. Fatty acids are predominantly straight-chain acids of 4 to 24 carbon atoms, which may be saturated or unsaturated; branched fatty acids and hydroxy fatty acids also occur, and very long chain acids of …
chrA03_49_64.589	GO:0006096	3.59604e-08	1	13	170	glycolytic process	BP	1.16332e-05	glycolytic process	The chemical reactions and pathways resulting in the breakdown of a carbohydrate into pyruvate, with the concomitant production of a small amount of ATP and the reduction of NAD(P) to NAD(P)H. Glycolysis begins with the metabolism of a carbohydrate to generate products that can enter the pathway and ends with the production of pyruvate. Pyruvate may be converted to acetyl-coenzyme A, ethanol, lac…
chrA03_49_64.639	GO:0006364	3.6514e-05	0.999996	7	90	rRNA processing	BP	0.00787485	rRNA processing	Any process involved in the conversion of a primary ribosomal RNA (rRNA) transcript into one or more mature rRNA molecules.
chrA03_49_64.979	GO:0009088	0.000165951	0.999997	3	10	threonine biosynthetic process	BP	0.0268426	threonine biosynthetic process	The chemical reactions and pathways resulting in the formation of threonine (2-amino-3-hydroxybutyric acid), a polar, uncharged, essential amino acid found in peptide linkage in proteins.
chrA06_122_124	NA	NA	NA	NA	NA	NA	NA	NA	NA	NA
chrA09_17_19	NA	NA	NA	NA	NA	NA	NA	NA	NA	NA
chrA10_173_185	NA	NA	NA	NA	NA	NA	NA	NA	NA	NA
chrA10_217_226	NA	NA	NA	NA	NA	NA	NA	NA	NA	NA
chrC01_156_166	GO:0006412	1.43469e-06	1	18	1344	translation	BP	0.000928244	translation	The cellular metabolic process in which a protein is formed, using the sequence of a mature mRNA molecule to specify the sequence of amino acids in a polypeptide chain. Translation is mediated by the ribosome, and begins with the formation of a ternary complex between aminoacylated initiator methionine tRNA, GTP, and initiation factor 2, which subsequently associates with the small subunit of the…
chrC02_1_13	NA	NA	NA	NA	NA	NA	NA	NA	NA	NA
chrC02_43_62	NA	NA	NA	NA	NA	NA	NA	NA	NA	NA
chrC03_10_24	NA	NA	NA	NA	NA	NA	NA	NA	NA	NA
chrC04_97_97	NA	NA	NA	NA	NA	NA	NA	NA	NA	NA
chrC08_40_41	NA	NA	NA	NA	NA	NA	NA	NA	NA	NA
chrC08_47_62	NA	NA	NA	NA	NA	NA	NA	NA	NA	NA
chrC09_0_4.1010	GO:0009306	0.000128281	0.999999	2	12	protein secretion	BP	0.0479177	protein secretion	The controlled release of proteins from a cell.
chrC09_0_4.1538	GO:0046417	0.000148123	0.999999	2	11	chorismate metabolic process	BP	0.0479177	chorismate metabolic process	The chemical reactions and pathways involving chorismate, the anion of (3R-trans)-3-((1-carboxyethenyl)oxy)-4-hydroxy-1,5-cyclohexadiene-1-carboxylic acid.
chrC09_57_60.621	GO:0006265	6.37709e-05	0.999998	4	48	DNA topological change	BP	0.0412598	DNA topological change	The process in which a transformation is induced in the topological structure of a double-stranded DNA helix, resulting in a change in linking number.
chrC09_57_60.1514	GO:0045132	0.000152804	0.999999	2	5	meiotic chromosome segregation	BP	0.049432	meiotic chromosome segregation	The process in which genetic material, in the form of chromosomes, is organized into specific structures and then physically separated and apportioned to two or more sets during M phase of the meiotic cell cycle.

## Sheet: genes_for_A03_hotspot
	name	B.napus_GO_term	GO_des	subject	AGI	At_symbol	note
3	BnaA01g00810D	GO:0006629;GO:0008152	lipid metabolic process;metabolic process	AT4G37050.1	AT4G37050	PATATIN-like protein 4	not_enriched
58	BnaA02g24400D	GO:0003824;GO:0006633;GO:0008152	catalytic activity;fatty acid biosynthetic process;metabolic process	AT5G46290.3	AT5G46290	3-ketoacyl-acyl carrier protein synthase I	enriched
83	BnaA03g09540D	GO:0006869;GO:0008289	lipid transport;lipid binding	NA	NA	NA	not_enriched
97	BnaA03g35790D	GO:0006071;GO:0006629;GO:0008081;GO:0008889	glycerol metabolic process;lipid metabolic process;phosphoric diester hydrolase activity;glycerophosphodiester phosphodiesterase activity	AT3G20520.1	AT3G20520	SHV3-like 3	not_enriched
117	BnaA04g00580D	GO:0004806;GO:0006629	triglyceride lipase activity;lipid metabolic process	AT3G61680.1	AT3G61680	alpha/beta-Hydrolases superfamily protein	not_enriched
148	BnaA05g06620D	GO:0003989;GO:0006633;GO:0009317;GO:0016874	acetyl-CoA carboxylase activity;fatty acid biosynthetic process;acetyl-CoA carboxylase complex;ligase activity	AT2G38040.1	AT2G38040	acetyl Co-enzyme a carboxylase carboxyltransferase alpha subunit	enriched
191	BnaA06g13570D	GO:0003824;GO:0006633;GO:0008152;GO:0016020	catalytic activity;fatty acid biosynthetic process;metabolic process;membrane	AT1G19440.1	AT1G19440	3-ketoacyl-CoA synthase 4	enriched
222	BnaA07g08280D	GO:0006629;GO:0016787	lipid metabolic process;hydrolase activity	AT1G28570.1	AT1G28570	SGNH hydrolase-type esterase superfamily protein	not_enriched
247	BnaA08g11130D	GO:0003824;GO:0006633;GO:0008152;GO:0008610;GO:0016020	catalytic activity;fatty acid biosynthetic process;metabolic process;lipid biosynthetic process;membrane	AT4G34520.1	AT4G34520	3-ketoacyl-CoA synthase 18	enriched
272	BnaA09g03610D	GO:0006633;GO:0031177	fatty acid biosynthetic process;phosphopantetheine binding	AT5G27200.1	AT5G27200	acyl carrier protein 5	enriched
284	BnaA09g17930D	GO:0003824;GO:0006633;GO:0008152	catalytic activity;fatty acid biosynthetic process;metabolic process	AT5G46290.3	AT5G46290	3-ketoacyl-acyl carrier protein synthase I	enriched
332	BnaA10g18080D	GO:0006631;GO:0006633;GO:0016491;GO:0045300;GO:0046914;GO:0055114	fatty acid metabolic process;fatty acid biosynthetic process;oxidoreductase activity;acyl-[acyl-carrier-protein] desaturase activity;transition metal ion binding;oxidation-reduction process	AT5G16240.1	AT5G16240	Plant stearoyl-acyl-carrier-protein desaturase family protein	enriched
333	BnaA10g18680D	GO:0003989;GO:0006633;GO:0009317	acetyl-CoA carboxylase activity;fatty acid biosynthetic process;acetyl-CoA carboxylase complex	AT5G15530.1	AT5G15530	biotin carboxyl carrier protein 2	enriched
338	BnaA10g28120D	GO:0005975;GO:0008152;GO:0030259	carbohydrate metabolic process;metabolic process;lipid glycosylation	AT1G43620.1	AT1G43620	UDP-Glycosyltransferase superfamily protein	not_enriched
360	BnaAnng26220D	GO:0004806;GO:0006629	triglyceride lipase activity;lipid metabolic process	AT3G48080.1	AT3G48080	alpha/beta-Hydrolases superfamily protein	not_enriched
380	BnaC01g17050D	GO:0012511;GO:0016021	monolayer-surrounded lipid storage body;integral component of membrane	NA	NA	NA	not_enriched
405	BnaC02g32010D	GO:0006629;GO:0016787	lipid metabolic process;hydrolase activity	AT5G45960.1	AT5G45960	GDSL-like Lipase/Acylhydrolase superfamily protein	not_enriched
406	BnaC02g36180D	GO:0004190;GO:0006508;GO:0006629	aspartic-type endopeptidase activity;proteolysis;lipid metabolic process	AT4G04460.1	AT4G04460	Saposin-like aspartyl protease family protein	not_enriched
423	BnaC03g21010D	GO:0003989;GO:0006633;GO:0009317;GO:0016874	acetyl-CoA carboxylase activity;fatty acid biosynthetic process;acetyl-CoA carboxylase complex;ligase activity	AT2G38040.1	AT2G38040	acetyl Co-enzyme a carboxylase carboxyltransferase alpha subunit	enriched
433	BnaC03g27520D	GO:0003824;GO:0004348;GO:0006665;GO:0006680;GO:0016020;GO:0016021	catalytic activity;glucosylceramidase activity;sphingolipid metabolic process;glucosylceramide catabolic process;membrane;integral component of membrane	AT5G49900.1	AT5G49900	Beta-glucosidase, GBA2 type family protein	not_enriched
439	BnaC03g29800D	GO:0006633;GO:0050080	fatty acid biosynthetic process;malonyl-CoA decarboxylase activity	AT4G04320.1	AT4G04320	malonyl-CoA decarboxylase family protein	enriched
448	BnaC03g33080D	GO:0006631;GO:0016491;GO:0045300;GO:0046914;GO:0055114	fatty acid metabolic process;oxidoreductase activity;acyl-[acyl-carrier-protein] desaturase activity;transition metal ion binding;oxidation-reduction process	AT3G02630.1	AT3G02630	Plant stearoyl-acyl-carrier-protein desaturase family protein	not_enriched
462	BnaC03g41620D	GO:0006071;GO:0006629;GO:0008081;GO:0008889;GO:0016020	glycerol metabolic process;lipid metabolic process;phosphoric diester hydrolase activity;glycerophosphodiester phosphodiesterase activity;membrane	AT3G20520.1	AT3G20520	SHV3-like 3	not_enriched
477	BnaC03g58800D	GO:0006629;GO:0016787	lipid metabolic process;hydrolase activity	AT1G28650.1	AT1G28650	GDSL-like Lipase/Acylhydrolase superfamily protein	not_enriched
484	BnaC03g65980D	GO:0003824;GO:0006633;GO:0008152;GO:0008610;GO:0016020	catalytic activity;fatty acid biosynthetic process;metabolic process;lipid biosynthetic process;membrane	AT4G34520.1	AT4G34520	3-ketoacyl-CoA synthase 18	enriched
497	BnaC04g03030D	GO:0006631;GO:0006633;GO:0016491;GO:0045300;GO:0046914;GO:0055114	fatty acid metabolic process;fatty acid biosynthetic process;oxidoreductase activity;acyl-[acyl-carrier-protein] desaturase activity;transition metal ion binding;oxidation-reduction process	AT2G43710.2	AT2G43710	Plant stearoyl-acyl-carrier-protein desaturase family protein	enriched
504	BnaC04g07230D	GO:0003989;GO:0006633;GO:0009317;GO:0016874	acetyl-CoA carboxylase activity;fatty acid biosynthetic process;acetyl-CoA carboxylase complex;ligase activity	AT2G38040.1	AT2G38040	acetyl Co-enzyme a carboxylase carboxyltransferase alpha subunit	enriched
526	BnaC04g32530D	GO:0012511;GO:0016021	monolayer-surrounded lipid storage body;integral component of membrane	AT5G40420.1	AT5G40420	oleosin 2	not_enriched
537	BnaC04g45500D	GO:0006869;GO:0008289	lipid transport;lipid binding	AT2G37870.1	AT2G37870	Bifunctional inhibitor/lipid-transfer protein/seed storage 2S albumin superfamily protein	not_enriched
600	BnaC06g08410D	GO:0005509;GO:0005544	calcium ion binding;calcium-dependent phospholipid binding	AT1G35720.1	AT1G35720	annexin 1	not_enriched
608	BnaC06g16060D	GO:0000166;GO:0080019	nucleotide binding;fatty-acyl-CoA reductase (alcohol-forming) activity	AT3G56700.1	AT3G56700	fatty acid reductase 6	not_enriched
618	BnaC06g22680D	GO:0003824;GO:0006633;GO:0008152	catalytic activity;fatty acid biosynthetic process;metabolic process	AT1G74960.2	AT1G74960	fatty acid biosynthesis 1	enriched
635	BnaC06g35760D	GO:0003824;GO:0006633;GO:0008152	catalytic activity;fatty acid biosynthetic process;metabolic process	AT1G74960.2	AT1G74960	fatty acid biosynthesis 1	enriched
652	BnaC07g11210D	GO:0000166;GO:0004316;GO:0006633;GO:0008152;GO:0016491;GO:0051287;GO:0055114	nucleotide binding;3-oxoacyl-[acyl-carrier-protein] reductase (NADPH) activity;fatty acid biosynthetic process;metabolic process;oxidoreductase activity;NAD binding;oxidation-reduction process	AT1G24360.1	AT1G24360	NAD(P)-binding Rossmann-fold superfamily protein	enriched
657	BnaC07g19000D	GO:0003824;GO:0006633;GO:0008152	catalytic activity;fatty acid biosynthetic process;metabolic process	AT5G46290.3	AT5G46290	3-ketoacyl-acyl carrier protein synthase I	enriched
686	BnaC08g03140D	GO:0012511;GO:0016021	monolayer-surrounded lipid storage body;integral component of membrane	NA	NA	NA	not_enriched
695	BnaC08g11970D	GO:0012511;GO:0016021	monolayer-surrounded lipid storage body;integral component of membrane	AT4G25140.1	AT4G25140	oleosin 1	not_enriched
729	BnaC09g03000D	GO:0006633	fatty acid biosynthetic process	AT5G27200.1	AT5G27200	acyl carrier protein 5	enriched
745	BnaC09g13240D	GO:0003824;GO:0004315;GO:0006633;GO:0008152;GO:0008610	catalytic activity;3-oxoacyl-[acyl-carrier-protein] synthase activity;fatty acid biosynthetic process;metabolic process;lipid biosynthetic process	AT1G62640.1	AT1G62640	3-ketoacyl-acyl carrier protein synthase III	enriched
752	BnaC09g19280D	GO:0003824;GO:0006633;GO:0008152	catalytic activity;fatty acid biosynthetic process;metabolic process	AT5G46290.3	AT5G46290	3-ketoacyl-acyl carrier protein synthase I	enriched
772	BnaC09g41580D	GO:0006631;GO:0006633;GO:0016491;GO:0045300;GO:0046914;GO:0055114	fatty acid metabolic process;fatty acid biosynthetic process;oxidoreductase activity;acyl-[acyl-carrier-protein] desaturase activity;transition metal ion binding;oxidation-reduction process	AT5G16240.1	AT5G16240	Plant stearoyl-acyl-carrier-protein desaturase family protein	enriched
773	BnaC09g42420D	GO:0003989;GO:0006633;GO:0009317	acetyl-CoA carboxylase activity;fatty acid biosynthetic process;acetyl-CoA carboxylase complex	AT5G15530.1	AT5G15530	biotin carboxyl carrier protein 2	enriched
783	BnaCnng00070D	GO:0006633;GO:0016790	fatty acid biosynthetic process;thiolester hydrolase activity	AT3G25110.1	AT3G25110	fatA acyl-ACP thioesterase	enriched
800	BnaCnng27390D	GO:0006629;GO:0016787	lipid metabolic process;hydrolase activity	AT1G54010.1	AT1G54010	GDSL-like Lipase/Acylhydrolase superfamily protein	not_enriched
